# Supplementary material
Source: publisher figshare collection journal article supplement (https://springernature.figshare.com/ndownloader/files/14014004)
Supplement: Supplementary file [file 14014004]

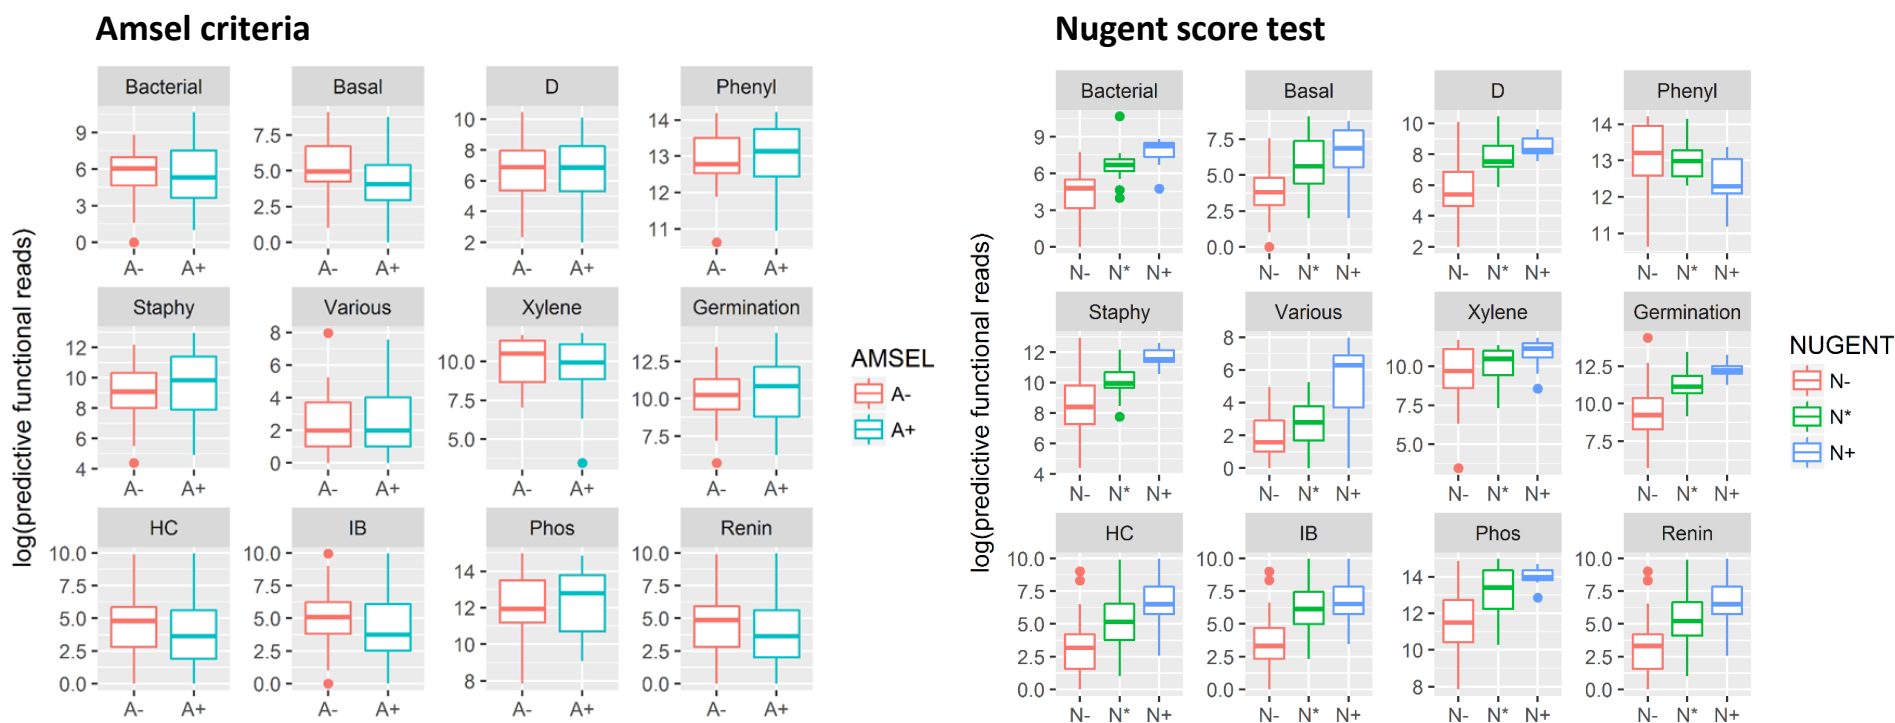

**Figure S9. Boxplots of 12 predictive functional categories that differed significantly among Nugent score test groups but not between the Amsel criteria groups ( $P < 0.05$ ).** The full module names are abbreviated as follows (1) Bacterial = Bacterial invasion of epithelial cells; (2) Basal = Basal transcription factors; (3) D = D-Arginine and D-ornithine metabolism; (4) Phenyl = Phenylpropanoid biosynthesis; (5) Staphy = Staphylococcus aureus infection; (6) Various = Various types of N glycan biosynthesis ; (7) Xylene = Xylene degradation; (8) Germination = Germination; (9) HC = Hypertrophic cardiomyopathy HCM; (10) IB = Isoflavonoid biosynthesis; (11) Phos = Phosphotransferase system PTS; (12) Renin = Renin angiotensin system.
